# Supplementary material for: Drought-Tolerance QTLs Associated with Grain Yield and Related Traits in Spring Bread Wheat
Source: MDPI journal article supplement (doi:10.3390/plants11070986), 2022-04-04
Supplement: s1 [file s1]

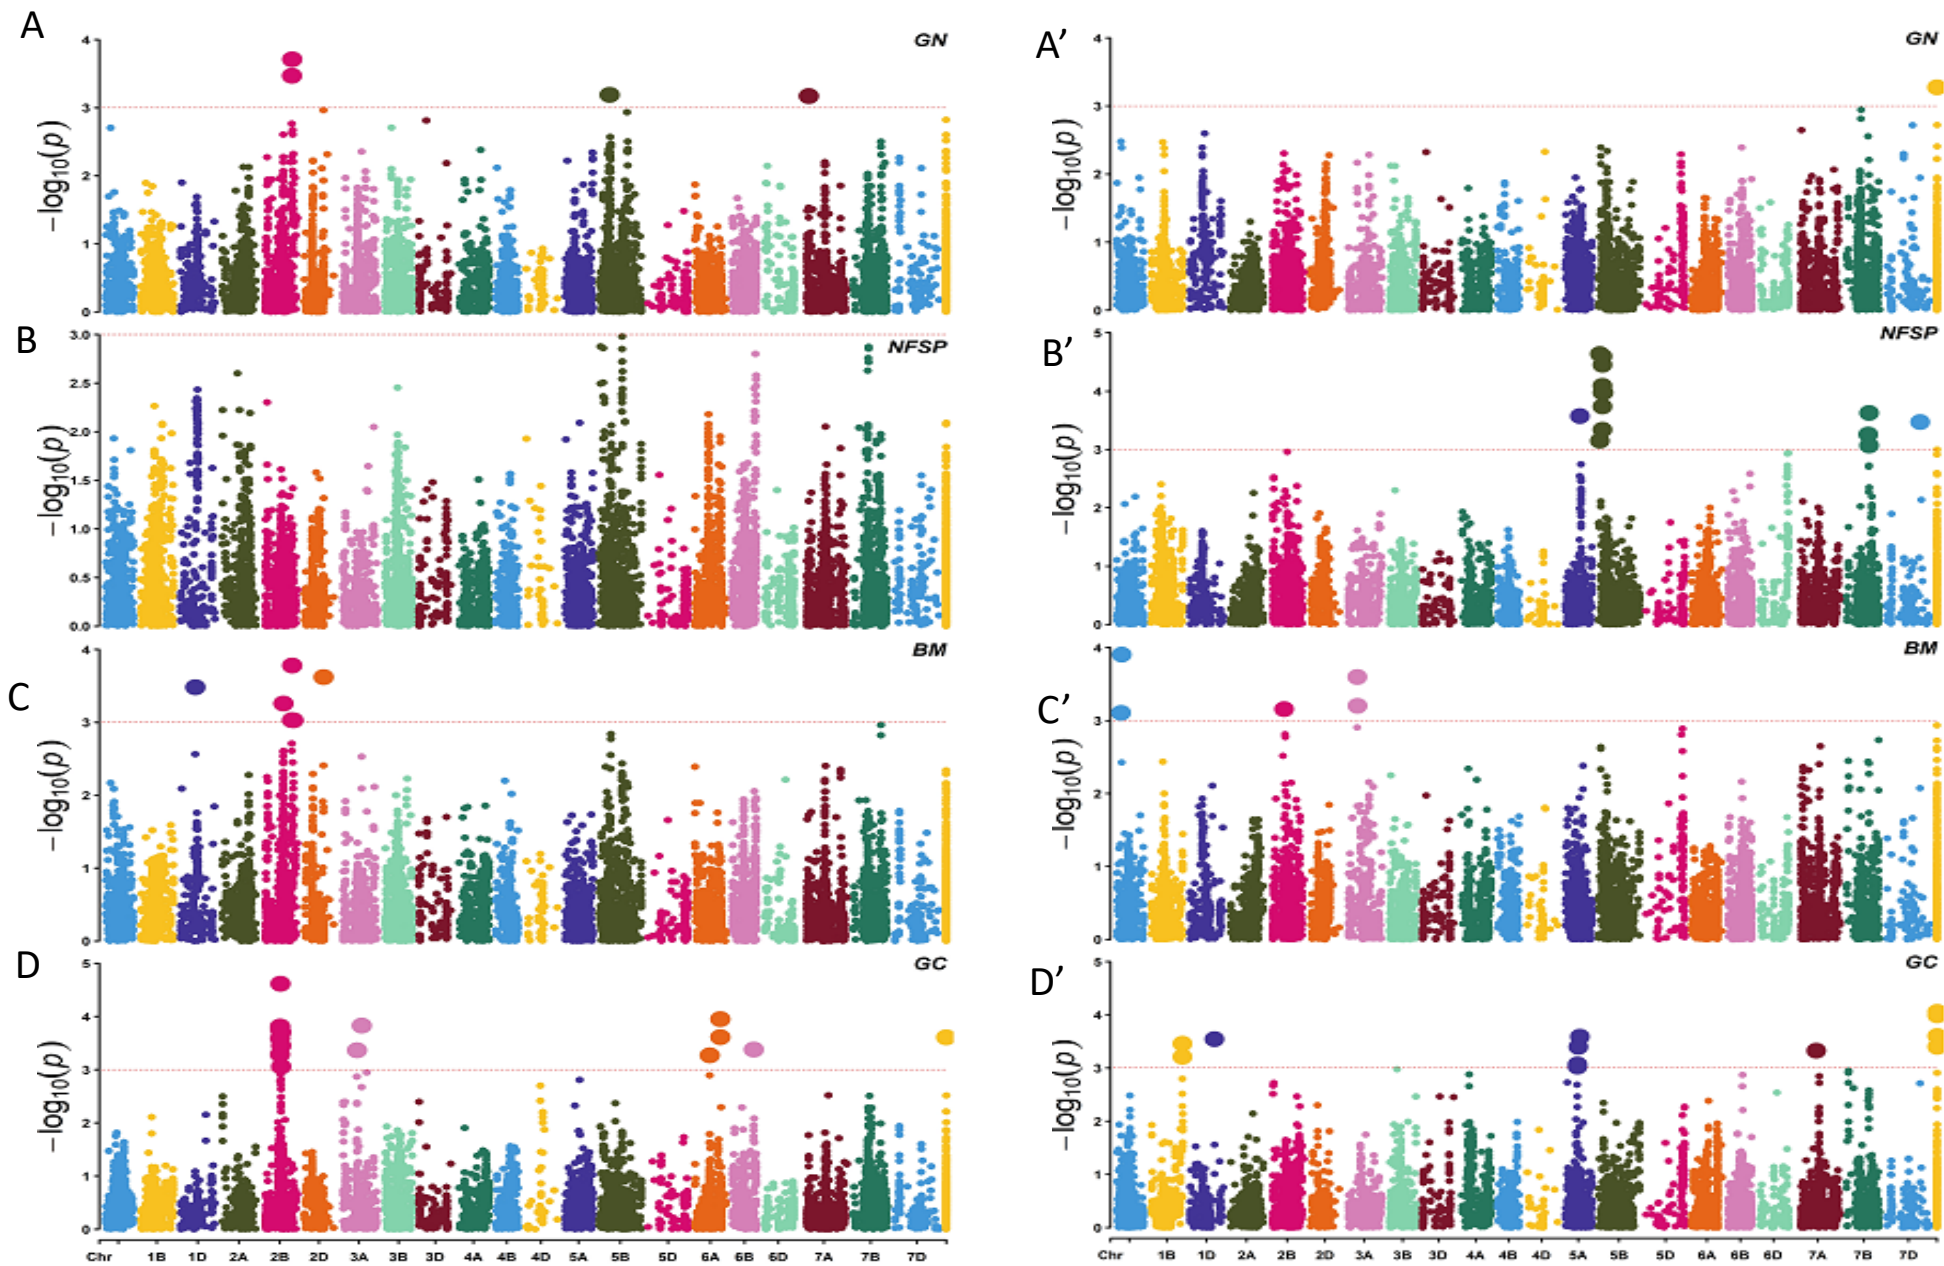

Supplementary Figure S1: Manhattan plots showing SNP markers associated with efficient secondary traits A, A') grain number ; B, B') Biomass ; C, C') number of fertile spikes per plant and D, D') ground cover at Sidi El Aidi and Taoujdate Stations respectively

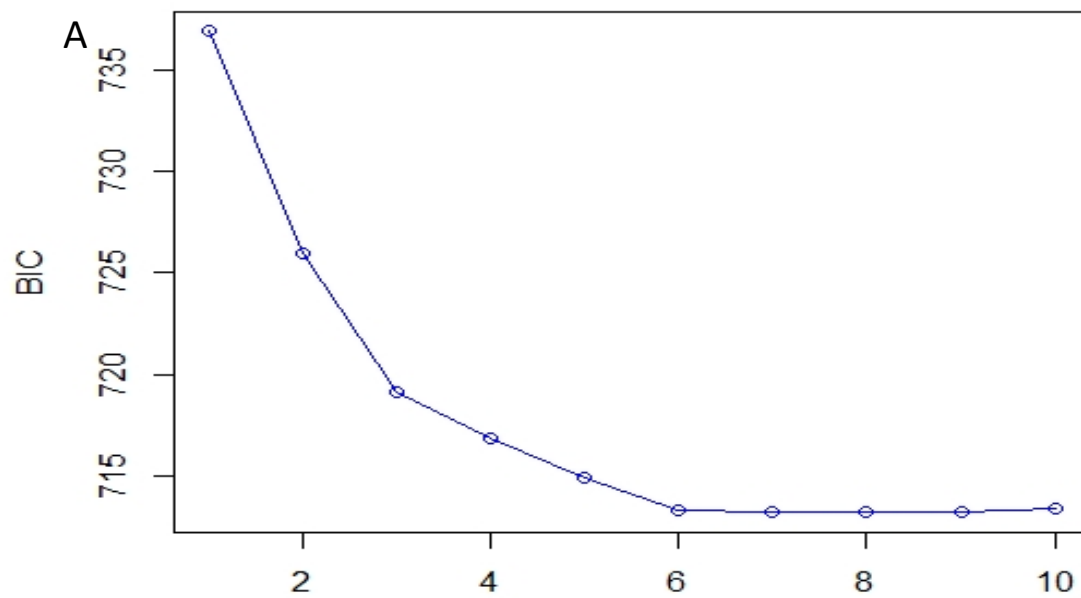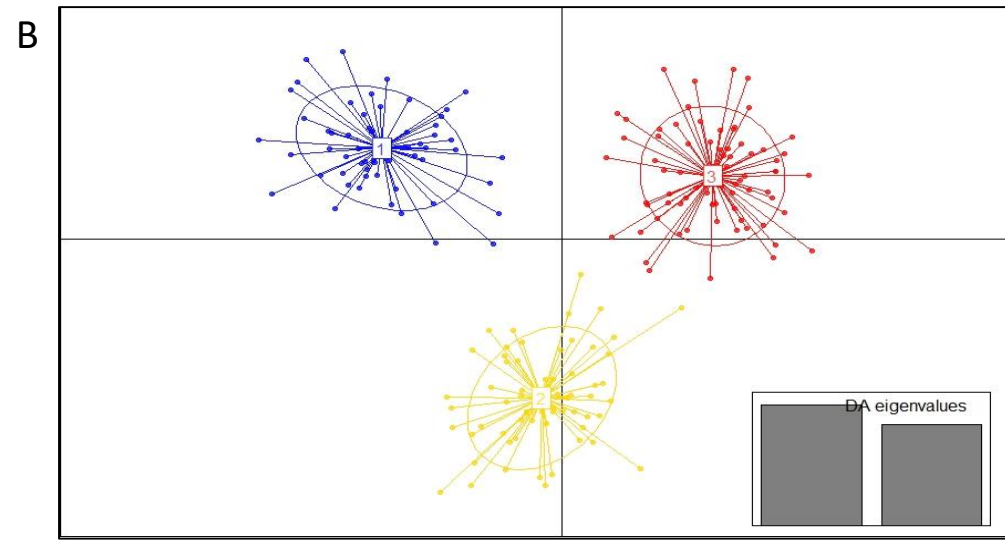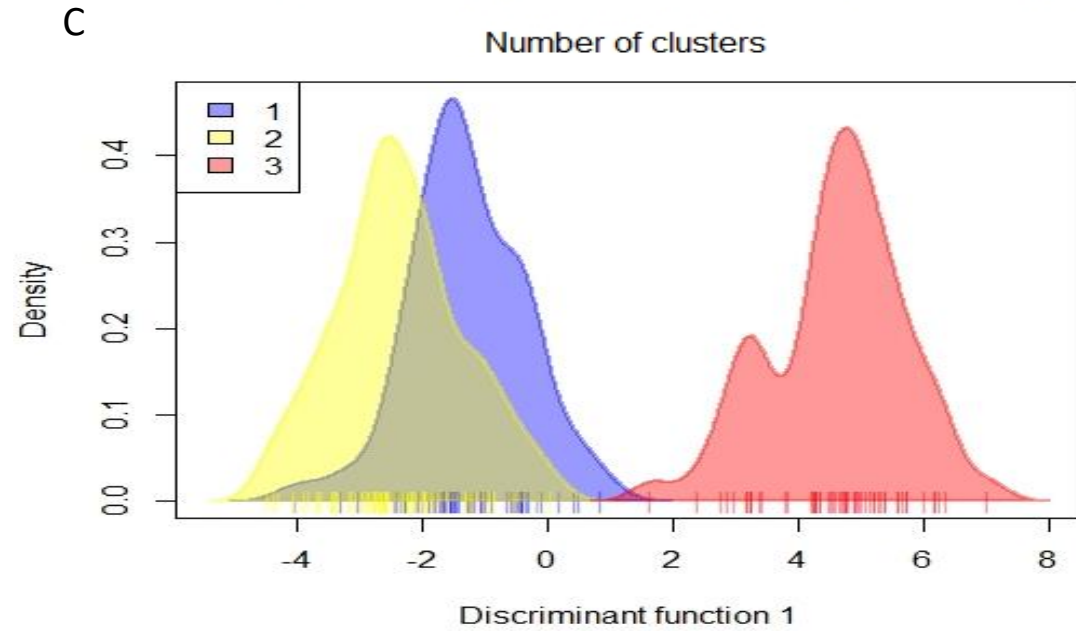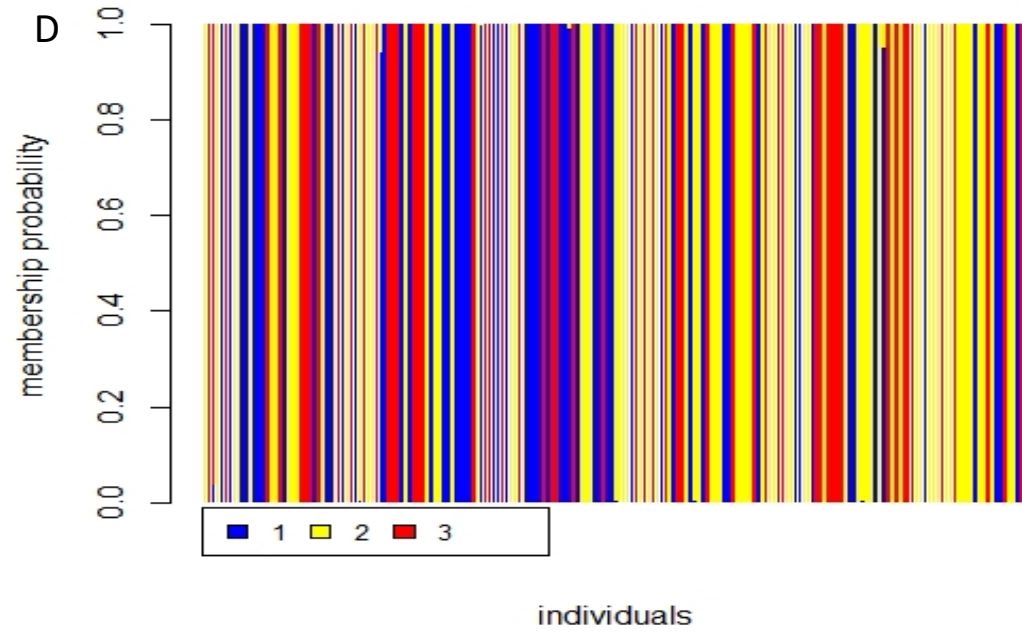

Supplementary Figure S2: Population structure (A) plot of the Bayesian information criterion (BIC) for each population number from 1 to 10 using a  $K$  means cluster, (B) biplot of the first two principal components (PCs) of the genotypic data, (C) population density, and (D) the assignment of each individual to the corresponding subpopulation

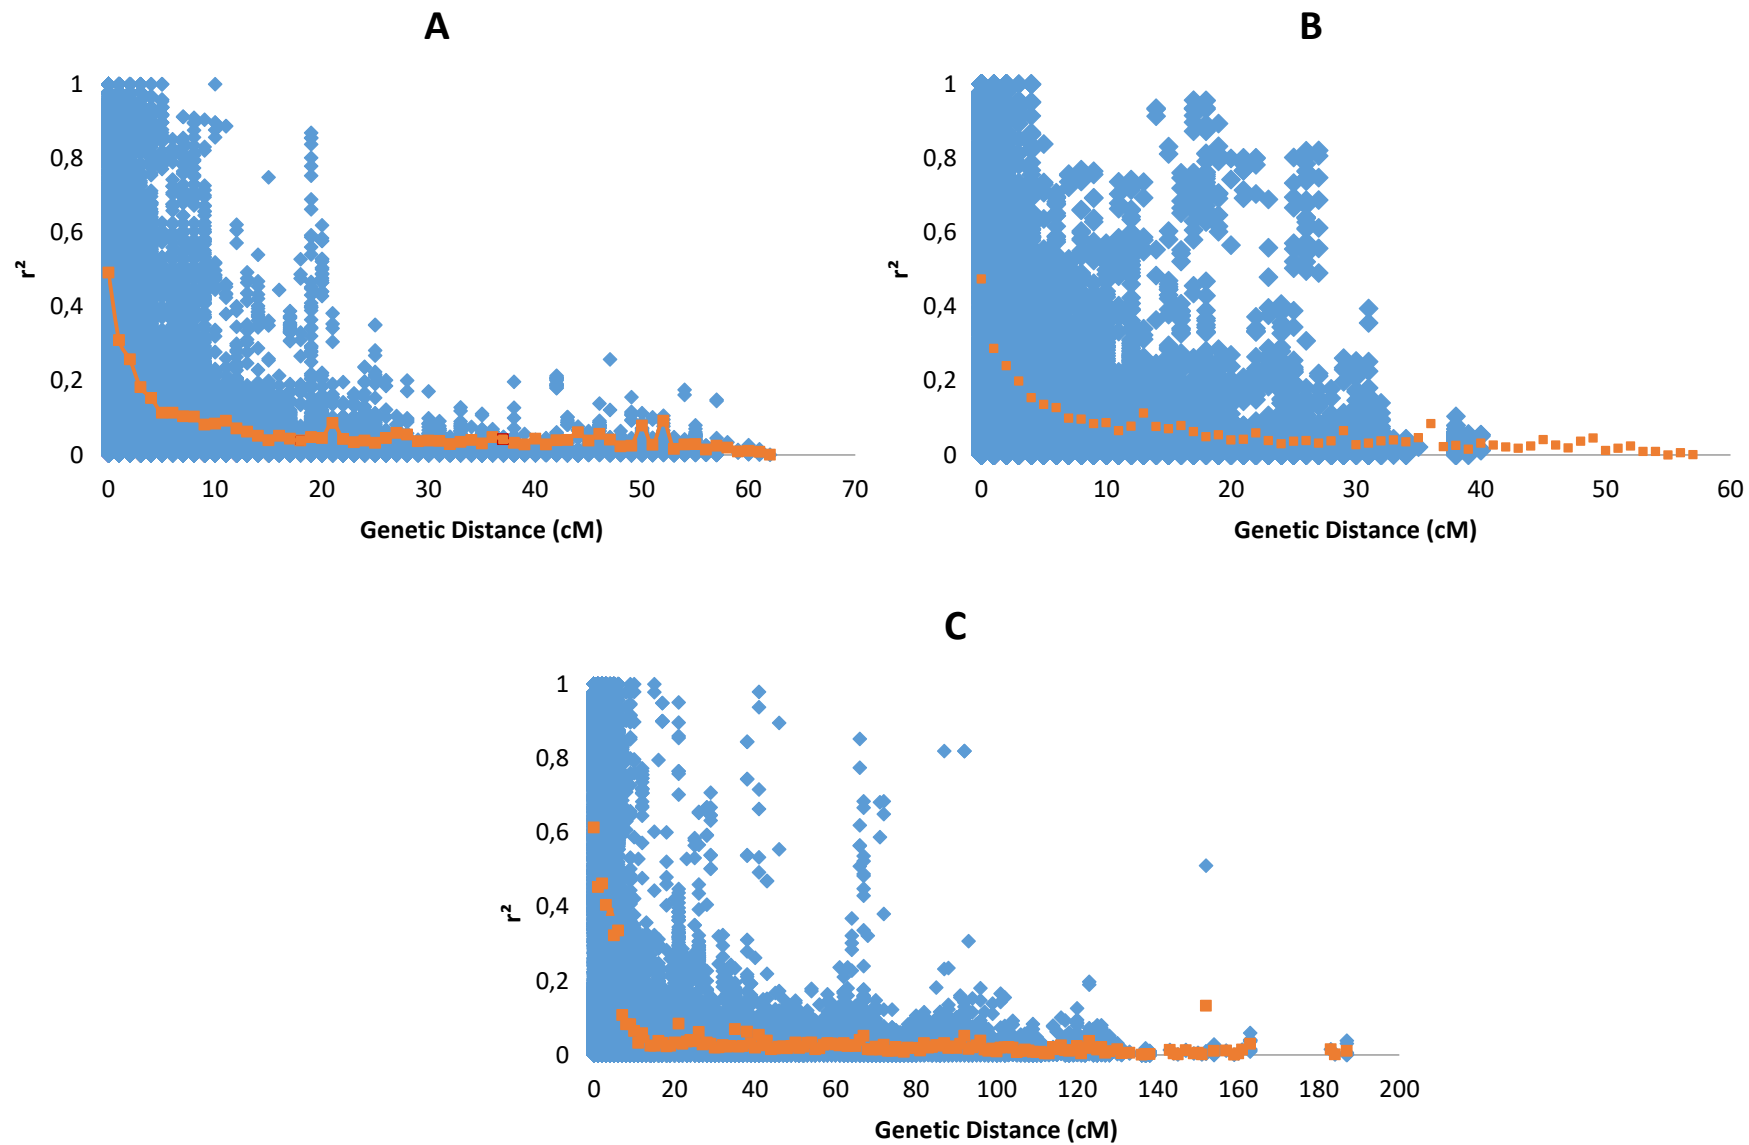

Supplementary Figure S3: Linkage disequilibrium( $r^2$ ) plot in 197 wheat genotypes across(A) genome A, (B) genome B and (C) genome D

Supplemental Table S1: Summary of main MTAs identified at  $p < 0.001$  for the average grain yield and drought related traits at Sidi El Aidi environment during 2015 and 2016 seasons

| Trait† | Marker                | Chr. | Pos.<br>cM | <i>p</i> | Marker R <sup>2</sup><br>% | Allele | Effect   | Frequency<br>% | Alternative<br>Allele | Frequency<br>% |
|--------|-----------------------|------|------------|----------|----------------------------|--------|----------|----------------|-----------------------|----------------|
| GY     | wsnp_BG263521B_Ta_2_1 | 2B   | 97         | 5.81E-04 | 0.06                       | C      | -3.92E4  | 45.4           | T                     | 54.6           |
|        | ExcalibuR_c24593_1217 | 7A   | 42         | 7.04E-04 | 0.06                       | C      | 1.47     | 44.6           | T                     | 55.4           |
| BM     | GENE-0675_104         | 2B   | 108        | 5.52E-04 | 0.06                       | C      | 33.34    | 9.7            | T                     | 90.3           |
|        | RFL_Contig5495_563    | 2B   | 161        | 9.39E-04 | 0.06                       | A      | 991.89   | 55.0           | G                     | 44.9           |
| GN     | ExcalibuR_c24593_1217 | 7A   | 42         | 6.76E-04 | 0.06                       | C      | 39385.42 | 44.6           | T                     | 55.4           |
|        | ExcalibuR_c32630_104  | 5B   | 52         | 6.45E-04 | 0.06                       | A      | 3.33     | 23.6           | G                     | 76.4           |
|        | KukRi_c94792_127      | 2B   | 153        | 3.40E-04 | 0.07                       | A      | 1.99     | 46.2           | G                     | 53.9           |
|        | wsnp_Ex_c298_580660   | 2B   | 154        | 1.95E-04 | 0.07                       | A      | 1.96     | 47.7           | G                     | 52.3           |
| TKW    | RFL_Contig2736_827    | 1B   | 96         | 9.02E-04 | 0.06                       | C      | -1.01E0  | 78.1           | T                     | 21.9           |
| GC     | BS00022417_51         | 2B   | 91         | 1.73E-04 | 0.08                       | A      | 1.55     | 7.7            | G                     | 92.3           |
|        | BS00022949_51         | 2B   | 91         | 1.53E-04 | 0.08                       | C      | -9.83E3  | 92.4           | T                     | 7.6            |
|        | BS00099097_51         | 2B   | 91         | 1.53E-04 | 0.08                       | C      | 9827.48  | 7.6            | T                     | 92.4           |
|        | IAAV2784              | 2B   | 91         | 1.53E-04 | 0.08                       | A      | 9827.48  | 7.6            | G                     | 92.4           |
|        | KukRi_c40953_658      | 2B   | 91         | 1.57E-04 | 0.08                       | C      | -1.41E4  | 92.4           | T                     | 7.7            |
|        | KukRi_c67546_279      | 2B   | 91         | 2.58E-04 | 0.07                       | C      | 0.80     | 91.7           | T                     | 8.3            |
|        | KukRi_c67546_342      | 2B   | 91         | 1.53E-04 | 0.08                       | A      | -2.05E0  | 7.6            | G                     | 92.4           |
|        | KukRi_c7139_6288      | 2B   | 91         | 1.57E-04 | 0.08                       | A      | 1.98     | 92.2           | G                     | 7.8            |

Supplemental Table S1 (continued) : Summary of main MTAs identified at  $p < 0.001$  for the average grain yield and drought related traits at Sidi El Aidi environment during 2015 and 2016 seasons

| Trait† | Marker                       | Chr. | Pos. | $p$      | Marker R <sup>2</sup> | Allele | Effect   | Frequency | Alternative | Frequency |
|--------|------------------------------|------|------|----------|-----------------------|--------|----------|-----------|-------------|-----------|
|        |                              |      | cM   |          | %                     |        |          | %         | Allele      | %         |
| GG     | RAC875_c15649_1101           | 2B   | 91   | 1.53E-04 | 0.08                  | C      | 1.63     | 7.6       | T           | 92.4      |
|        | RAC875_c31252_173            | 2B   | 91   | 1.71E-04 | 0.08                  | G      | 8628.15  | 7.7       | A           | 92.3      |
|        | RFL_Contig1385_326           | 2B   | 91   | 1.53E-04 | 0.08                  | A      | 2.05     | 92.4      | G           | 7.6       |
|        | BS00065418_51                | 2B   | 92   | 1.53E-04 | 0.08                  | G      | -2.05E0  | 7.6       | A           | 92.4      |
|        | GENE-4359_102                | 2B   | 92   | 1.57E-04 | 0.08                  | A      | 1.60     | 7.7       | G           | 92.4      |
|        | RAC875_Rep_c118376_304       | 2B   | 92   | 1.53E-04 | 0.08                  | A      | -1.63E0  | 92.4      | G           | 7.6       |
|        | wsnp_CAP11_Rep_c8700_3756682 | 2B   | 92   | 1.53E-04 | 0.08                  | C      | -1.63E0  | 92.4      | T           | 7.6       |
|        | Ku_c34010_1016               | 2B   | 93   | 2.41E-05 | 0.10                  | A      | 2.35     | 6.6       | G           | 93.4      |
|        | BS00064851_51                | 2B   | 97   | 1.94E-04 | 0.07                  | A      | 0.54     | 10.7      | G           | 89.3      |
|        | Ku_c4777_2494                | 2B   | 97   | 1.99E-04 | 0.07                  | C      | -5.33E-1 | 89.3      | T           | 10.7      |
|        | wsnp_Ex_Rep_c67786_66472676  | 3A   | 110  | 1.48E-04 | 0.08                  | A      | 0.68     | 10.7      | G           | 89.3      |
|        | KukRi_c41482_311             | 6A   | 134  | 1.12E-04 | 0.08                  | A      | -2.40E-1 | 9.8       | G           | 90.2      |
|        | wsnp_JD_Rep_c65886_41872083  | 6A   | 134  | 2.44E-04 | 0.07                  | C      | 35390.06 | 10.2      | T           | 89.9      |
|        | wsnp_Ra_c21546_30949373      | NP   | 1    | 2.46E-04 | 0.07                  | A      | 45456.10 | 10.8      | G           | 89.2      |

† GY Grain yield; BM biomass; NFSP number of fertile spikes per plant; GN Number of grains per m<sup>2</sup>, TKW Thousand kernel weight; GC Ground cover; NP: Unknown position

Supplemental Table S2: Summary of main MTAs identified at  $p < 0.001$  for the average grain yield and drought related traits in Taoujdate environment during 2015 and 2016 seasons

| Trait† | Marker                          | Chr. | Pos. | $p$      | Marker $R^2$ | Allele | Effect   | Frequency | Alternative | Frequency |
|--------|---------------------------------|------|------|----------|--------------|--------|----------|-----------|-------------|-----------|
|        |                                 |      | cM   |          | %            |        |          | %         | Allele      | %         |
| GY     | wsnp_Ex_c3145_5812670           | 1A   | 96   | 7.43E-04 | 0.06         | C      | -3.09E0  | 90.0      | T           | 10.0      |
|        | BS00067775_51                   | 4B   | 6    | 3.03E-04 | 0.07         | C      | -5.49E-1 | 78.0      | T           | 22.0      |
|        | wsnp_Ra_c2078_4037878           | 4B   | 6    | 5.57E-04 | 0.06         | C      | -4.04E-1 | 77.5      | T           | 22.5      |
|        | RAC875_c78248_154               | NP   | 1    | 1.81E-04 | 0.08         | A      | 0.63     | 20.4      | G           | 79.6      |
|        | TduRuM_contig14482_1013         | NP   | 2    | 4.47E-04 | 0.07         | C      | 1.34     | 67.3      | T           | 32.7      |
| BM     | RAC875_c34888_65                | 1A   | 35   | 7.82E-04 | 0.06         | A      | 7.41     | 5.1       | G           | 94.9      |
|        | tplb0043h23_1346                | 1A   | 38   | 1.24E-04 | 0.08         | C      | 10.67    | 8.7       | T           | 91.3      |
|        | ExcalibuR_c20196_503            | 2B   | 69   | 0.00304  | 0.05         | A      | 5.79     | 92.9      | G           | 7.1       |
|        | IACX1098                        | 2B   | 75   | 6.97E-04 | 0.06         | A      | -2.08E0  | 46.4      | G           | 53.6      |
|        | wsnp_Ex_Rep_c70571_6948<br>8416 | 2B   | 81   | 0.00154  | 0.05         | A      | -2.06E-1 | 26.6      | G           | 73.4      |
|        | BS00010055_51                   | 2B   | 82   | 0.00168  | 0.05         | A      | 1.59     | 12.8      | G           | 87.2      |
|        | BS00048757_51                   | 3A   | 60   | 2.51E-04 | 0.07         | A      | 1.09     | 48.9      | G           | 51.1      |
|        | BS00065956_51                   | 3A   | 61   | 6.24E-04 | 0.06         | A      | -1.98E-1 | 47.4      | G           | 52.6      |
| NFSP   | Ra_c22700_818                   | 5A   | 83   | 2.68E-04 | 0.07         | A      | 41189.75 | 27.8      | G           | 72.2      |
|        | KukRi_Rep_c109397_59            | 5B   | 6    | 2.30E-05 | 0.10         | G      | 43272.53 | 21.6      | A           | 78.4      |
|        | wsnp_Ku_c64203_64579087         | 5B   | 6    | 7.11E-04 | 0.06         | C      | 31166.58 | 19.0      | T           | 81.0      |
|        | BobWhite_Rep_c50066_63          | 5B   | 20   | 1.05E-04 | 0.08         | A      | 32187.29 | 11.7      | G           | 88.3      |
|        | ExcalibuR_c3948_1315            | 5B   | 20   | 3.54E-05 | 0.09         | C      | -3.69E4  | 77.6      | T           | 22.4      |
|        | KukRi_c2514_490                 | 5B   | 20   | 8.11E-05 | 0.09         | A      | -3.71E4  | 76.9      | G           | 23.1      |
|        | TduRuM_contig25432_1218         | 5B   | 20   | 2.52E-05 | 0.10         | C      | 39371.81 | 21.5      | T           | 78.5      |
|        | TduRuM_contig25432_1377         | 5B   | 20   | 1.83E-04 | 0.08         | A      | -3.41E4  | 75.8      | G           | 24.2      |
|        | wsnp_BF201102B_Ta_2_5           | 5B   | 20   | 4.58E-04 | 0.07         | A      | -3.32E4  | 87.7      | G           | 12.3      |
|        | wsnp_BE499835B_Ta_2_5           | 5B   | 25   | 1.05E-04 | 0.08         | G      | 1.55     | 11.7      | A           | 88.3      |

Supplemental Table S2 (continued) : Summary of main MTAs identified at  $p < 0.001$  for the average grain yield and drought related traits in Taoujdate environment during 2015 and 2016 seasons

| Trait†      | Marker                  | Chr. | Pos.<br>cM | <i>p</i> | Marker R <sup>2</sup><br>% | Allele | Effect   | Frequency<br>% | Alternative<br>Allele | Frequency<br>% |
|-------------|-------------------------|------|------------|----------|----------------------------|--------|----------|----------------|-----------------------|----------------|
| <b>NFSP</b> | TduRuM_contig5360_329   | 7B   | 114        | 5.53E-04 | 0.07                       | A      | -5.58E4  | 70.4           | G                     | 29.6           |
|             | BS00085556_51           | 7B   | 119        | 2.37E-04 | 0.08                       | G      | 54180.92 | 26.3           | A                     | 73.7           |
|             | RAC875_c89312_61        | 7B   | 119        | 8.55E-04 | 0.07                       | C      | 55713.65 | 25.1           | T                     | 74.9           |
|             | IAAV6659                | 7D   | 180        | 3.39E-04 | 0.08                       | A      | 50735.16 | 25.9           | G                     | 74.1           |
| <b>GN</b>   | CAP12_c3807_144         | NP   | 1          | 5.32E-04 | 0.06                       | C      | 5.02     | 51.8           | T                     | 48.2           |
| <b>TKW</b>  | CAP8_c1799_237          | 3B   | 62         | 5.69E-04 | 0.06                       | A      | -4.99E-1 | 5.1            | G                     | 94.9           |
| <b>GC</b>   | TduRuM_contig9144_222   | 1B   | 171        | 3.49E-04 | 0.07                       | G      | 13.28    | 53.9           | A                     | 46.1           |
|             | wsnp_BE446672B-Ta_2_1   | 1B   | 171        | 6.15E-04 | 0.06                       | C      | -3.32E4  | 43.5           | T                     | 56.5           |
|             | BS00022188_51           | 1D   | 132        | 2.86E-04 | 0.07                       | C      | -3.47E-1 | 93.7           | T                     | 6.3            |
|             | GENE-3318_556           | 5A   | 70         | 9.37E-04 | 0.06                       | C      | -2.01E0  | 9.1            | T                     | 90.9           |
|             | KukRi_c14889_1086       | 5A   | 70         | 8.54E-04 | 0.06                       | C      | 18.53    | 9.2            | T                     | 90.8           |
|             | KukRi_c14889_116        | 5A   | 70         | 9.00E-04 | 0.06                       | C      | -1.06E4  | 89.9           | T                     | 10.1           |
|             | ExcalibuR_c9210_168     | 5A   | 75         | 4.00E-04 | 0.06                       | A      | 3.18     | 90.4           | G                     | 9.6            |
|             | Ra_c22700_818           | 5A   | 83         | 2.58E-04 | 0.07                       | A      | 0.63     | 27.8           | G                     | 72.2           |
|             | KukRi_c57674_324        | 7A   | 113        | 4.70E-04 | 0.06                       | C      | 0.37     | 85.1           | T                     | 14.9           |
|             | BS00072156_51           | NP   | 2          | 8.74E-05 | 0.08                       | A      | -2.33E1  | 92.4           | G                     | 7.6            |
|             | BS00083514_51           | NP   | 2          | 2.49E-04 | 0.07                       | C      | -2.38E1  | 93.9           | T                     | 6.1            |
|             | ExcalibuR_Rep_c68708_80 | NP   | 2          | 4.00E-04 | 0.06                       | A      | 9302.79  | 90.4           | G                     | 9.6            |
|             | KukRi_c41594_74         | NP   | 2          | 3.95E-04 | 0.06                       | C      | 9643.83  | 90.3           | T                     | 9.7            |

† GY Grain yield; BM biomass; NFSP number of fertile spikes per plant; GN Number of grains per m<sup>2</sup>, TKW Thousand kernel weight; GC Ground cover; NP: Unknown position

Supplemental Table S3 : List of the genetic panel and lines pedigrees

| Genotype | Name/Pedigree                                                         | Genotype | Name/Pedigree                                      |
|----------|-----------------------------------------------------------------------|----------|----------------------------------------------------|
| 1        | ATTILA*2/PBW65//PFAU/MILAN                                            | 41       | KAUZ//ALTAR 84/AOS/3/MILAN/DUCULA                  |
| 2        | SERI.1B//KAUZ/HEVO/3/AMAD/4/PFAU/MILAN                                | 42       | QAFZAH-16/ICARDA-SRRL-5                            |
| 3        | QAFZAH-21/ICARDA-SRRL-9                                               | 43       | ESDA/SHWA//BCN/3/MILAN/PASTOR                      |
| 4        | KAUZ'S/SERI/3/KAUZ//KAUZ/STAR                                         | 44       | KAUZ//ALTAR 84/AOS/3/MILAN/DUCULA                  |
| 5        | SERI.1B//KAUZ/HEVO/3/AMAD/4/PFAU/MILAN                                | 45       | SERI.1B*2/3/KAUZ*2/BOW//KAUZ/4/ANGI-2              |
| 6        | ATTILA*2/PBW65//PFAU/MILAN                                            | 46       | HUBARA-5/PASTOR-2                                  |
| 7        | CROC1/AE.SQUARROSSA (205)//KAUZ/3/ATTILA/4/FLAG-1                     | 47       | GIRWILL-13/2*PASTOR-2                              |
| 8        | BACANORA T 88/SHIHAB-8                                                | 48       | HUBARA-7/4/PASTOR/3/KAUZ*2/OPATA//KAUZ             |
| 9        | KAUZ'S'/BOCRO-3//ANGI-2                                               | 49       | HIDDAB/CHAM-8                                      |
| 10       | GOUBARA-1/ANGI-1                                                      | 50       | QIMMA-12                                           |
| 11       | ATTILA 50Y//ATTILA/BCN/3/PFAU/MILAN                                   | 51       | ANGI-2/HUBARA-3                                    |
| 12       | HUBARA-5/ANGI-1                                                       | 52       | ESDA/SHWA//BCN/3/MILAN/PASTOR                      |
| 13       | SERI.1B//KAUZ/HEVO/3/AMAD/4/KAUZ/FLORKWA-1                            | 53       | SOMAMA-9/ICARDA-SRRL-2                             |
| 14       | KAUZ'S'/SERI/3/KAUZ//KAUZ/STAR                                        | 54       | SERI.1B//KAUZ/HEVO/3/AMAD/4/PFAU/MILAN             |
| 15       | GIRWILL-13/2*PASTOR-2                                                 | 55       | ATTILA//VEE#5/DOBUC'S'/3/QADANFER-9                |
| 16       | CHILERO-1/4/VEE'S'/3/HORK/4MH//KAL-BB/5/PFAU/MILAN                    | 56       | HIDDAB/CHAM-8                                      |
| 17       | HIDDAB/CHAM-8                                                         | 57       | DEBEIRA/ANGI-2                                     |
| 18       | CROC1/AE.SQUARROSSA (205)//KAUZ/3/ATTILA/4/FLAG-1                     | 58       | QAFZAH-2/FERROUG-2//ZEMAMRA-8                      |
| 19       | SERI 82/SHUHA'S'//GRU90-204782/4/PASTOR/3/KAUZ*2/OPATA//KAUZ          | 59       | KAUZ//MON/CROW'S/3/VEE/PJN//2*KAUZ                 |
| 20       | ZEMAMRA-1/2*SOMAMA-3                                                  | 60       | KAUZ'S'/SERI/3/KAUZ//KAUZ/STAR                     |
| 21       | ZOLOTARA//SHA3/SERI/3/KAUZ/2*STAR                                     | 61       | ANGI-5/ZEMAMRA-8                                   |
| 22       | ATTILA//VEE#5/DOBUC'S'/3/QADANFER-9                                   | 62       | KAUZ'S'/FLORKWA-1//GOURMIA-3                       |
| 23       | ATTILA//VEE#5/DOBUC'S'/3/QADANFER-9                                   | 63       | YMI #6/GEN//TIA.1/3/VEE#5//DOVE/BUC/4/MILAN/PASTOR |
| 24       | ESDA/SHWA//BCN/3/MILAN/PASTOR                                         | 64       | SERI 82/SHUHA'S'//GRU90-204782/3/MUNIA/CHTO//MILAN |
| 25       | PASTOR-2                                                              | 65       | SERI.1B*2/3/KAUZ*2/BOW//KAUZ/4/ANGI-1              |
| 26       | HUBARA-13/4/TRAP#1/BOW//PFAU/3/MILAN                                  | 66       | HUBARA-5/PASTOR-2                                  |
| 27       | HUBARA-5/5/CHEN/AEGILOPS SQUARROSA (TAUS)//BCN/3/VEE#7/BOW/4/PASTOR   | 67       | HUBARA-15/CATBIRD//PASTOR-2                        |
| 28       | IZAZ-1/KATILA-11//GOURMIA-3                                           | 68       | QAFZAH-23/SOMAMA-3//GOURMIA-3                      |
| 29       | SERI.1B//KAUZ/HEVO/3/AMAD/4/PFAU/MILAN                                | 69       | ATTILA*2/PBW65//PFAU/MILAN                         |
| 30       | BOUSHODA-1/5/CHEN/AEGILOPS SQUARROSA (TAUS)//BCN/3/VEE#7/BOW/4/PASTOR | 70       | PASTOR-2/HUBARA-5                                  |
| 31       | ANGI-2/HUBARA-3                                                       | 71       | SERI.1B*2/3/KAUZ*2/BOW//KAUZ/4/KAUZ/FLORKWA-1      |
| 32       | QIMMA-12/PASTOR-6//QIMMA-12                                           | 72       | KAUZ'S'/FLORKWA-1//GOURMIA-3                       |
| 33       | SOMAMA-9/ICARDA-SRRL-2                                                | 73       | SERI.1B//KAUZ/HEVO/3/AMAD/4/PFAU/MILAN             |
| 34       | VEE/PJN//2*KAUZ/3/SHUHA-4/FOW-2                                       | 74       | HAAMA-17/ANGI-2                                    |
| 35       | QAFZAH-2/FERROUG-2//ZEMAMRA-8                                         | 75       | ATTILA-7                                           |
| 36       | SOMAMA-9/NEJMAH-18                                                    | 76       | SERI.1B*2/3/KAUZ*2/BOW//KAUZ/4/ANGI-2              |
| 37       | KAUZ'S'/SERI/3/KAUZ//KAUZ/STAR                                        | 77       | ATTILA*2/PBW65//PFAU/MILAN                         |
| 38       | HUBARA-5/5/CHEN/AEGILOPS SQUARROSA (TAUS)//BCN/3/VEE#7/BOW/4/PASTOR   | 78       | ATTILA//VEE#5/DOBUC'S'/3/QADANFER-9                |
| 39       | SERI.1B//KAUZ/HEVO/3/AMAD/4/PFAU/MILAN                                | 79       | KAUZ//MON/CROW'S'/3/KAUZ//KAUZ/STAR/5/SHAMIEKH-7   |
| 40       | QAFZAH-35/AMIR-2                                                      | 80       | SERI.1B*2/3/KAUZ*2/BOW//KAUZ/4/ANGI-1              |



Supplemental Table S3 (continued): List of genetic material and pedigrees

| Genotype | Name/Pedigree                                                          | Genotype | Name/Pedigree                                                          |
|----------|------------------------------------------------------------------------|----------|------------------------------------------------------------------------|
| 81       | SERI.1B//KAUZ/HEVO/3/AMAD/4/PFAU/MILAN                                 | 121      | P1.861/RDWG//PBW343/3/MUNIA/ALTAR 84//AMSEL                            |
| 82       | GOUMRIA-15/ANGI-2                                                      | 122      | OPATA/RAYON//KAUZ/3/2*MILAN/DUCULA                                     |
| 83       | HUBARA-16/4/PASTOR/3/KAUZ*2/OPATA//KAUZ                                | 123      | KAUZ'S/SHUHA-15                                                        |
| 84       | SERI 82/SHUHA'S//GRU90-204782/3/MUNIA/CHTO//MILAN                      | 124      | VEE/PJN//2*TUI/3/WH576/4/AL-ZEHRAA-5                                   |
| 85       | HIDDAB/CHAM-8                                                          | 125      | Sids-1 (CHECK-5)                                                       |
| 86       | SOMAMA-9/ICARDA-SRRL-2                                                 | 126      | ANGI-2                                                                 |
| 87       | KAUZ'S/SERI/3/KAUZ//KAUZ/STAR                                          | 127      | SERI.1B*2/3/KAUZ*2/BOW//KAUZ/4/ANGI-1/5/KABOWSH-1                      |
| 88       | VEE/PJN//2*KAUZ/3/SHUHA-4/FOW-2                                        | 128      | MILAN/DUCULA//AL-ZEHRAA-1                                              |
| 89       | VEE/PJN//2*KAUZ/3/SHUHA-4/FOW-2                                        | 129      | BOW/PRL//BUC/3/WH576                                                   |
| 90       | ATTILA*2/PBW65//PFAU/MILAN                                             | 130      | CHEN/AEGILOPS SQUARROSA (TAUS)//FCT/3/2*WEAVER/4/IPA-95                |
| 91       | SERI 82/SHUHA'S//GRU90-204782/4/PASTOR/3/KAUZ*2/OPATA//KAUZ            | 131      | QADANFER-11                                                            |
| 92       | ATTILA//VEE#5/DOBUC'S/3/QADANFER-9                                     | 132      | QADANFER-11/REBWAH-11                                                  |
| 93       | QAFZAH-33*2/SALSAL-2                                                   | 133      | PASTOR/3/KAUZ*2/OPATA//KAUZ                                            |
| 94       | ATTILA//VEE#5/DOBUC'S/3/QADANFER-9                                     | 134      | P1.861/RDWG/3/VEE/PJN//2*KAUZ/4/CMH82A.1294/2*KAUZ//MUNIA/CHTO/3/MILAN |
| 95       | SERI.1B*2/3/KAUZ*2/BOW//KAUZ/4/ANGI-1                                  | 135      | VEE7/KAUZ/3/KAUZ//MON/CROW'S/4/QAFZAH-33                               |
| 96       | BOUSHODA-1/5/CHEN/AEGILOPS SQUARROSA (TAUS)//BCN/3/VEE#7/BOW/4/PASTOR  | 136      | MILAN//PSN/BOW                                                         |
| 97       | PASTOR-2/HUBARA-5                                                      | 137      | KAUZ//MON/CROW'S/3/SOMAMA-3/4/MILAN/DUCULA                             |
| 98       | SERI 82/SHUHA'S//GRU90-204782/3/MUNIA/CHTO//MILAN                      | 138      | GOUBARA-1/ANGI-1//QAFZAH-21                                            |
| 99       | SERI.1B*2/3/KAUZ*2/BOW//KAUZ/4/ANGI-2                                  | 139      | ATTILA 50Y//ATTILA/BCN/3/KAUZ//MON/CROW'S/4/MILAN/PASTOR               |
| 100      | KABOWSH-1 (CHECK-4)                                                    | 140      | VEE7/KAUZ//PFAU/MILAN/3/MILAN/PASTOR                                   |
| 101      | QAFZAH-35/AMIR-2                                                       | 141      | VEE7/KAUZ//PFAU/MILAN/3/MILAN/PASTOR                                   |
| 102      | LAKTA-1/QAFZAH-21                                                      | 142      | QADANFER-11/REBWAH-11                                                  |
| 103      | SOMAMA-9                                                               | 143      | P1.861/RDWG/3/VEE/PJN//2*KAUZ/4/CMH82A.1294/2*KAUZ//MUNIA/CHTO/3/MILAN |
| 104      | SERI.1B//KAUZ/HEVO/3/AMAD/4/ATTILA//PSN/BOW/3/ATTILA/5/KAUZ'S/SHUHA-15 | 144      | SERI.1B*2/3/KAUZ*2/BOW//KAUZ/4/ANGI-1/5/KABOWSH-1                      |
| 105      | VEE7/KAUZ//PFAU/MILAN/3/MILAN/PASTOR                                   | 145      | ZEMAMRA-1                                                              |
| 106      | MUNIA/ALTAR 84//AMSEL                                                  | 146      | VEE/PJN//2*TUI/3/WH576                                                 |
| 107      | ATTILA//VEE#5/DOBUC'S/3/PYN/BAU//MILAN/4/ZEMAMRA-8                     | 147      | CHEN/AEGILOPS SQUARROSA (TAUS)//FCT/3/2*WEAVER                         |
| 108      | ATTILA-7//MILAN/PASTOR/3/HXL8088/DUCULA                                | 148      | P1.861/RDWG//DAJAJ-10/3/MILAN/PASTOR                                   |
| 109      | VEE7/KAUZ//PFAU/MILAN/3/MILAN/PASTOR                                   | 149      | PASTOR-6                                                               |
| 110      | URES/BOW//OPATA/3/HD2206/HORK'S'                                       | 150      | Debira                                                                 |
| 111      | SERI.1B//KAUZ/HEVO/3/AMAD/4/ATTILA//PSN/BOW/3/ATTILA/5/KAUZ'S/SHUHA-15 | 151      | QAMAR-6                                                                |
| 112      | SHIHAB-16                                                              | 152      | KAUZ//ALTAR 84/AOS/3/TNMU/MILAN/4/MILAN//PSN/BOW                       |
| 113      | VEE7/KAUZ//PFAU/MILAN/3/MILAN/PASTOR                                   | 153      | PFAU/MILAN                                                             |
| 114      | KAUZ'S/SERI/3/KAUZ//KAUZ/STAR                                          | 154      | KAUZ//ALTAR 84/AOS/3/TNMU/MILAN/4/MILAN//PSN/BOW                       |
| 115      | MILAN/DUCULA                                                           | 155      | KASYON/GENARO 81//TEVEE-1/./3/2*QADANFER-11                            |
| 116      | MILAN/DUCULA//AL-ZEHRAA-1                                              | 156      | VEE/PJN//2*KAUZ                                                        |
| 117      | QADANFER-11/REBWAH-11                                                  | 157      | SERI.1B//KAUZ/HEVO/3/AMAD/4/ATTILA//PSN/BOW/3/ATTILA/5/KAUZ'S/SHUHA-15 |
| 118      | SERI.1B//KAUZ/HEVO/3/AMAD/4/ATTILA//PSN/BOW/3/ATTILA/5/KAUZ'S/SHUHA-15 | 158      | OPATA/RAYON//KAUZ/3/CHAM-6/FLORKWA-2/5/SHAMIEKH-7                      |
| 119      | P1.861/RDWG//PBW343/3/MUNIA/ALTAR 84//AMSEL                            | 159      | P1.861/RDWG//PBW343/3/MUNIA/ALTAR 84//AMSEL                            |
| 120      | KAUZ//ALTAR 84/AOS 3/KAUZ/3/SHUHA-4//NS732/HER/4/QAFZAH-33             | 160      | WEAVER/WL 3928//SW 89.3064/3/SOMAMA-3/4/BOW/PRL//BUC/3/WH576           |

# Supplemental Table S3 (continued): List of genetic material and pedigrees

| Genotype | Name/Pedigree                                                                    |
|----------|----------------------------------------------------------------------------------|
| 161      | FLAG-1                                                                           |
| 162      | KAUZ'S/FLORKWA-1                                                                 |
| 163      | QAFZAH-35                                                                        |
| 164      | ZEMAMRA-8                                                                        |
| 165      | ATTILA//VEE#5/DOBUC'S/3/PYN/BAU//MILAN/4/ZEMAMRA-8                               |
| 166      | QAFZAH-33                                                                        |
| 167      | KAUZ//ALTAR 84/AOS 3/KAUZ/3/ATTILA 50Y//ATTILA/BCN/4/PASTOR-6                    |
| 168      | VEE/PJN//2*TUI/3/WH576/4/AL-ZEHRAA-5                                             |
| 169      | P1.861/RDWG//DAJAJ-10/3/MILAN/PASTOR                                             |
| 170      | ATTILA 50Y//ATTILA/BCN/3/KAUZ//MON/CROW'S/4/MILAN/PASTOR                         |
| 171      | OPATA/RAYON//KAUZ/3/2*MILAN/DUCULA                                               |
| 172      | QADANFER-11/REBWAH-11                                                            |
| 173      | SHAMISS-3                                                                        |
| 174      | SERI.1B//KAUZ/HEVO/3/AMAD/4/ATTILA//PSN/BOW/3/ATTILA/5/KAUZ'S/SHUHA-15           |
| 175      | GOUNMRIA-3                                                                       |
| 176      | OPATA/RAYON//KAUZ/3/2*MILAN/DUCULA                                               |
| 177      | QADANFER-11/REBWAH-11                                                            |
| 178      | KATILA-8/4/SKAUZ/BAV92/3/CROC-1/AE.SQUARROSA(224)//OPATA/5/MUNIA/ALTAR 84//MILAN |
| 179      | FAYEQ-1                                                                          |
| 180      | RABIH-7                                                                          |
| 181      | ATTILA-7//MILAN/PASTOR/3/ICARDA-SRRL-2                                           |
| 182      | QADANFER-11/REBWAH-11                                                            |
| 183      | QADANFER-9                                                                       |
| 184      | KASYON/GENARO 81//TEVEE-1/./3/2*QADANFER-11                                      |
| 185      | KAUZ//ALTAR 84/AOS 3/KAUZ/3/SHUHA-4//NS732/HER/4/QAFZAH-33                       |
| 186      | SERI.1B*2/3/KAUZ*2/BOW//KAUZ/4/KAUZ/GYS//KAUZ/5/MUNIA/ALTAR 84//MILAN            |
| 187      | VEE/PJN//2*TUI/3/WH576/4/AL-ZEHRAA-5                                             |
| 188      | HAAMA-17/QIMMA-12                                                                |
| 189      | KAUZ//MON/CROW'S/3/SHUHA-4//NS732/HER/4/MILAN/PASTOR                             |
| 190      | QADANFER-11/REBWAH-11                                                            |
| 191      | SERI.1B//KAUZ/HEVO/3/AMAD/4/ATTILA//PSN/BOW/3/ATTILA/5/KAUZ'S/SHUHA-15           |
| 192      | KAUZ'S/SERI//STAR'S/FLORKWA-2/3/FLAG-1                                           |
| 193      | MILAN/PASTOR                                                                     |
| 194      | ANGI-1                                                                           |
| 195      | SAMIRA-9                                                                         |
| 196      | MILAN/DUCULA//AL-ZEHRAA-1                                                        |
| 197      | KAUZ//MON/CROW'S/3/KAUZ//KAUZ/STAR/5/SHAMIEKH-7                                  |
| 198      | SHIHAB-19                                                                        |
| 199      | VEE7/KAUZ/3/KAUZ//MON/CROW'S/4/QAFZAH-33                                         |
| 200      | HIDDAB                                                                           |
